# Supplementary material
Source: PubMed Central journal article supplement (PMC10331382)
Supplement: sj-pdf-1-vdi-10.1177_10406387231171568.pdf [file sj-pdf-1-vdi-10.1177_10406387231171568.pdf]

**Supplemental Table 1.** Details of cases presented to the University of California–Davis, Veterinary Medical Teaching Hospital.

| Case | Diagnoses (size of defect, as reported) | Type of defect     | Age, d | Sex | Breed               | Cardiogenic lesions                                                                       | Noncardiogenic processes          | Cause of death                |
|------|-----------------------------------------|--------------------|--------|-----|---------------------|-------------------------------------------------------------------------------------------|-----------------------------------|-------------------------------|
| 1    | VSD (3 mm)                              | Data not available | 4      | M   | Mix (Boer × Nubian) | None                                                                                      | Atresia ani                       | GI obstruction                |
| 2    | VSD (5 mm)                              | Perimembranous     | 14     | M   | Toggenburg          | Pulmonary congestion                                                                      | None                              | Cardiac                       |
| 3    | VSD (5 mm)                              | Perimembranous     | 120    | F   | Boer                | Pulmonary congestion                                                                      | Vertebral malformation            | Multiple malformations        |
| 4    | VSD (6 mm)                              | Perimembranous     | 1      | F   | Boer                | None                                                                                      | Right ectopic ureter              | Cardiac                       |
| 5    | VSD (8 × 6 mm)                          | Perimembranous     | 90     | F   | Nigerian dwarf      | Pulmonary edema                                                                           | Bacterial bronchopneumonia        | Cardiorespiratory, infectious |
| 6    | VSD (8 mm)                              | Perimembranous     | Adult  | F   | Mix (unknown)       | Ascites, hepatic acute passive congestion                                                 | Dystocia                          | Cardiac, dystocia             |
| 7    | VSD (14 × 6 mm)                         | Perimembranous     | 35     | M   | Boer                | None                                                                                      | Radiocarpal septic osteoarthritis | Cardiac                       |
| 8    | VSD (12 mm)                             | Perimembranous     | 1,460  | F   | Nubian              | Tricavitary effusion, hepatic acute passive congestion, Anasarca                          | 3 mo pregnant                     | Cardiac                       |
| 9    | VSD (12.5 mm)                           | Perimembranous     | 3,285  | CM  | Nubian              | Cervical edema                                                                            | Forestomach impaction             | GI obstruction                |
| 10   | VSD (20 mm)                             | Perimembranous     | 2,190  | F   | Nubian              | Pulmonary edema, tricavitary effusion, hepatic chronic passive congestion, cervical edema | Traumatic wounds from dog bites   | Trauma                        |
| 11   | VSD (13 × 10 mm)                        | Muscular or inlet  | 1,095  | F   | Nubian              | Pulmonary edema, thoracic/abdominal effusion, hepatic chronic passive congestion          | None                              | Cardiac                       |
| 12   | VSD (5 mm), PFO (5 mm)                  | Perimembranous     | 28     | M   | Nigerian dwarf      | Tricavitary effusion, pulmonary edema, cyanosis                                           | None                              | Cardiac                       |
| 13   | VSD (9 mm), PFO (7 mm)                  | Perimembranous     | 14     | M   | Toggenburg          | None                                                                                      | None                              | Cardiac                       |
| 14   | VSD (4 mm), PDA, PFO                    | Perimembranous     | 2      | F   | Toggenburg          | Pulmonary edema                                                                           | Pulmonary edema                   | Cardiac                       |

Congenital heart defects in goats

|    |                                                                        |                           |          |    |            |                                                                                          |                                                           |                        |
|----|------------------------------------------------------------------------|---------------------------|----------|----|------------|------------------------------------------------------------------------------------------|-----------------------------------------------------------|------------------------|
| 15 | VSD (size not available), PDA (size not available)                     | Perimembranous            | 10       | F  | Saanen     | Pleura/pericardial effusion, pulmonary edema                                             | None                                                      | Cardiac                |
| 16 | VSD (20 mm), pulmonary stenosis                                        | Data not available        | 730      | F  | Nubian     | Pulmonary edema                                                                          | Post-kidding                                              | Cardiac                |
| 17 | DORV with VSD, PFO/ASD                                                 | Subaortic or noncommitted | 7        | F  | Nubian     | Pulmonary edema                                                                          | None                                                      | Cardiac                |
| 18 | DORV with VSD (10 mm), PFO (10 mm)                                     | Subpulmonary              | 14       | F  | Alpine     | Pulmonary edema                                                                          | None                                                      | Cardiac                |
| 19 | DORV with VSD (8 × 5 mm)                                               | Data not available        | 30       | F  | Sonnet     | Pulmonary edema                                                                          | Right renal aplasia, right aural dysplasia and hypoplasia | Cardiac                |
| 20 | ASD (4 mm)                                                             | Ostium secundum           | 90       | CM | Boer       | Ventral edema                                                                            | Urolithiasis                                              | Urolithiasis           |
| 21 | ASD/PFO (10 mm)                                                        | NA                        | 1        | M  | Boer       | None                                                                                     | None                                                      | Cardiac                |
| 22 | Tricuspid atresia with VSD (5 mm), PFO/ASD (15 mm), PS, and PDA (1 mm) | NA                        | 4        | M  | Toggenburg | None                                                                                     | None                                                      | Cardiac                |
| 23 | Tricuspid atresia without VSD, PFO/ASD (15 mm)                         | NA                        | Neonatal | F  | Boer       | Cyanotic, Atelectasis, bronchial artery hypertrophy                                      | None                                                      | Cardiac                |
| 24 | Tricuspid valve dysplasia, VSD (10 × 12 mm), PDA (2 mm), PFO (10 mm)   | Infundibular              | 4        | F  | Toggenburg | Pulmonary edema                                                                          | Bacterial ruminitis                                       | Cardiac, infectious    |
| 25 | Mitral valve dysplasia/tricuspid valve dysplasia                       | NA                        | 300      | M  | Nubian     | Pulmonary edema and hemorrhage, tricavitary effusion, hepatic chronic passive congestion | Diarrhea                                                  | Cardiac                |
| 26 | Tetralogy of Fallot                                                    | NA                        | 180      | F  | Toggenburg | Pulmonary edema, tricavitary effusion, hepatic acute passive congestion                  | None                                                      | Cardiac                |
| 27 | Cor triatriatum sinister                                               | NA                        | 730      | M  | Boer       | Pulmonary edema                                                                          | Urolithiasis, uroperitoneum                               | Urolithiasis           |
| 28 | Complete atrioventricular canal, common arterial trunk                 | NA                        | 2        | F  | Toggenburg | None                                                                                     | Palatoschisis, sternal agenesis                           | Multiple malformations |
| 29 | Ventricular dilation (cause unknown)                                   | NA                        | 14       | M  | Angora     | Pulmonary edema                                                                          | None                                                      | Cardiac                |

ASD = atrial septal defect; CM = castrated male; DORV = double-outlet right ventricle; F = female; M = male; NA = not applicable; PDA = patent ductus arteriosus; PFO = persistent foramen ovale; PS = pulmonic stenosis; VSD = ventricular septal defect.

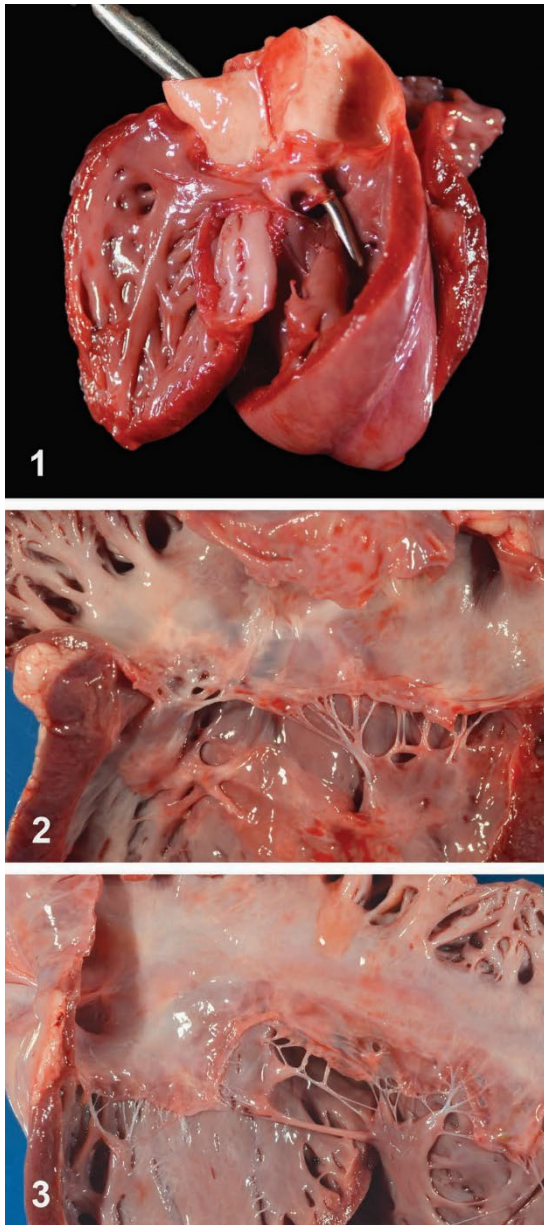

**Supplemental Figure 1.** Double-outlet right ventricle with subpulmonary ventricular septal defect (VSD) from case 18, a 14-d-old Alpine kid. The probe is passing through the VSD. **Supplemental Figures 2, 3.** Atrioventricular valvular dysplasia in case 25, a 10-mo-old Nubian goat. **Supplemental Figure 2.** Severe mitral valve dysplasia characterized by significant shortening and thickening of the chordae tendineae of the posterior papillary muscle (left) causing small and tethered leaflets. The false chorda tendinea that generally forms a thin cord between the papillary muscle and endocardium is also dysplastic, forming a thick fibrous plaque on the endocardium. The anterior papillary muscle has abnormally bridging chordae and thin, tethered leaflets. **Supplemental Figure 3.** Mild tricuspid valve dysplasia forming a thin fibrous fold at the margin between the septal and anterior leaflets.
